# Supplementary material
Source: PubMed Central journal article supplement (PMC9933627)
Supplement: iai.00420-22-s0001.pdf [file iai.00420-22-s0001.pdf]

**Supplementary Figure S1.** Comparison of salt-responsive gene expression in *H. pylori* strains containing WT Fur or Fur-R88H. The overlap in the Venn diagrams illustrates the number of genes that are salt-responsive in both strains. A) Genes that are upregulated in response to high-salt conditions in the indicated strains (FDR<0.05, fold change >2). B) Genes that are downregulated in response to high-salt conditions in the indicated strains (FDR<0.05, fold change <0.5). A total of 336 genes are upregulated in response to high-salt conditions in both the Fur-R88H and WT FurR-containing strains (panel A), while 222 genes are downregulated in response to high-salt conditions in both the Fur-R88H and WT Fur-containing strains (panel B). The remaining numbers in the Venn diagram illustrate genes that are salt-responsive in only one of the strains.

**Supplementary Figure S2.** Comparison of gene expression in *H. pylori* strains containing WT Fur or Fur-R88H. *H. pylori* strains were cultured under both routine and high-salt conditions. A) Comparison of genes that were increased in expression in the Fur-R88H variant compared to the strain containing WT Fur under the indicated conditions. A total of 57 genes were increased in expression under regular salt conditions in the Fur-R88H variant compared to the strain containing WT Fur (FDR <0.05, fold >2). In contrast, only 3 genes were increased in expression under high-salt conditions in the Fur-R88H variant compared to strain containing WT Fur (FDR<0.05, fold >2). A single gene (i.e. *fecA2*, Table 1, Supplementary Table 1) was increased in expression in the Fur-R88H variant under both regular and high-salt conditions. B) Analysis of genes that were decreased in expression in the Fur-R88H variant compared to the strain containing WT Fur under the indicated conditions. A total of 53 genes were expressed at a lower level under regular salt conditions in the Fur-R88H strain compared to the strain containing WT Fur (FDR<0.05, fold <0.5). Four genes were expressed at lower levels in the Fur-R88H variant compared to the strain containing WT Fur under high-salt conditions (FDR<0.05, fold <0.5).

**Supplementary Figure S3.** Relative fitness of *fecA2* mutants in strains containing either WT Fur strain or Fur-R88H. A) Depiction of strains used for this analysis. Strain JL3B contains WT Fur and a cassette containing the chloramphenicol acetyltransferase gene and a unique DNA barcode (TAG1) inserted into the deleted *fecA2* locus. Strain JL4 is a strain that contains Fur-R88H and a *cat*-TAG2 sequence inserted into the deleted *fecA2* locus. The indicated strains were mixed 1:1 and serially passaged (once every 3.5 days) on medium containing either 0.5% (panel B) or 0.9% added NaCl (panel C). At the indicated time points, bacteria were harvested and genomic DNA was isolated. The proportion of each strain in the bacterial population was then quantified by qPCR as described in the Methods. The primers for the qPCR analyses (Supplemental Table S4) included a tag-specific primer (TSP) and a gene-specific primer (GSP). The results are from 2 independent experiments. qPCR analysis for each time point was performed in triplicate and the mean value is reported.

**Supplementary Figure S4.** Reduced fitness of a *fecA2* mutant in either the presence or absence of supplemental ferric citrate. A) Depiction of strains used for this analysis. Strain JL1 contains WT Fur and a cassette containing the chloramphenicol acetyltransferase gene and a unique DNA barcode (TAG1) inserted into the *mdaB-hydA* locus. Strain JL3A contains WT Fur and a DNA barcode (TAG2) inserted into the deleted *fecA2* locus. A 1:1 mixture of strains JL1 and JL3A were cultured on medium containing either 0.5% (panel B) or 0.9% (panel D) added NaCl. Competition experiments were also done using media supplemented with 100  $\mu$ M ferric citrate (panels C, E). The bacteria from the plates were subjected to continuous passage (once every 3.5 days) for 21 days. At the indicated time points, bacteria were harvested and genomic DNA was isolated. The proportion of each strain in the bacterial population was then quantified by qPCR as described in the Methods. qPCR primer pairs involving a tag-specific primer (TSP) and gene-specific primer (GSP) are listed in Supplemental Table S4. The results are from 2 independent experiments. qPCR analysis was performed in triplicate on samples from each time point, and the mean values are reported.

A. Genes upregulated (1.0% vs 0.5% NaCl)

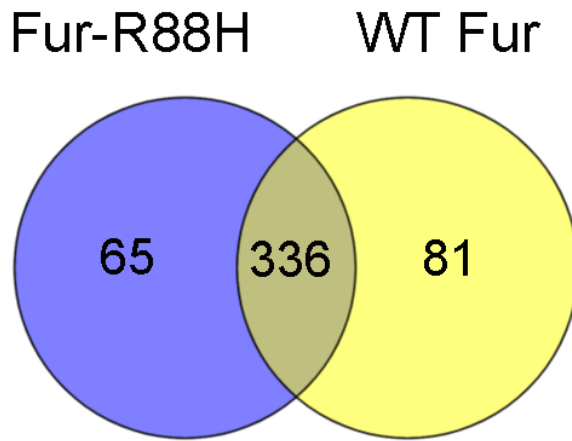

B. Genes downregulated (1.0% vs 0.5% NaCl)

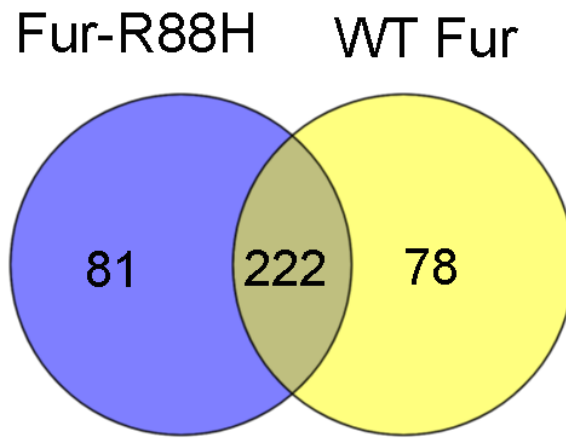

Supplementary Fig S1

A. Increased expression in Fur-R88H compared to WT Fur

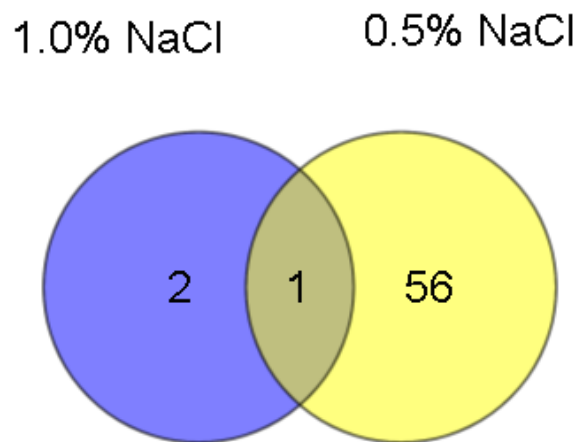

B. Decreased expression in Fur-R88H compared to WT Fur

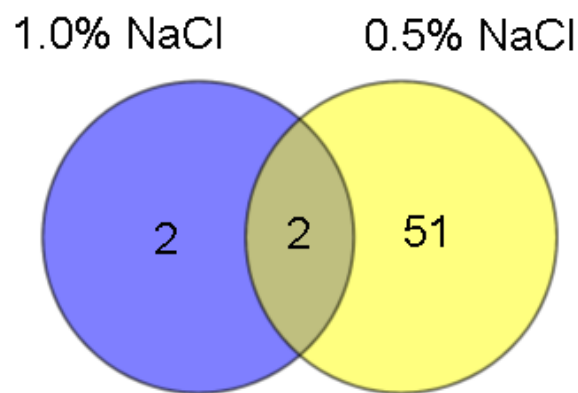

Supplementary Fig S2

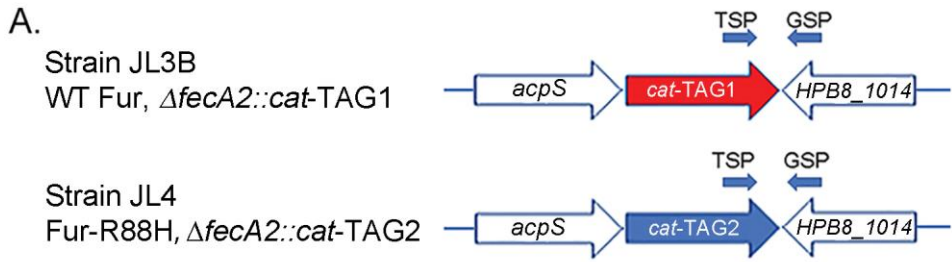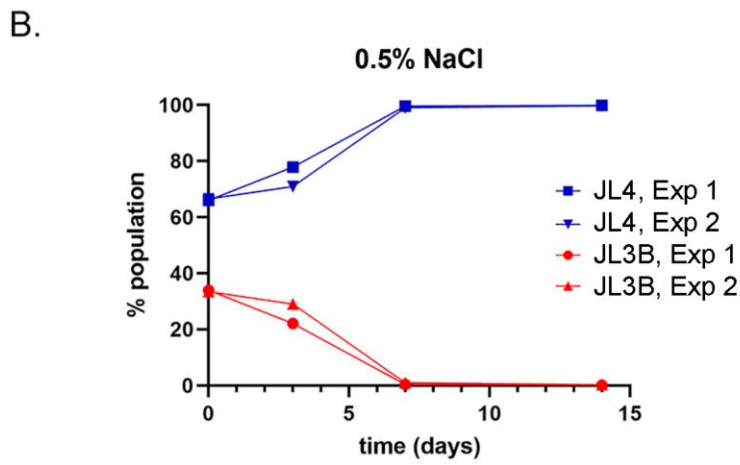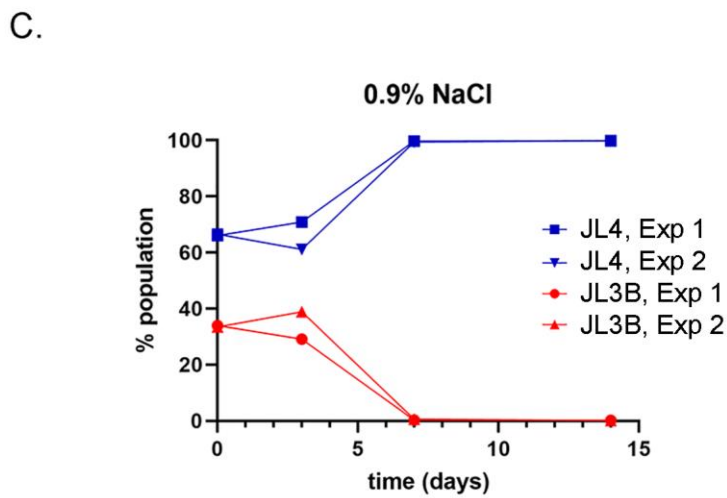

Supplementary Fig S3

**A.**

Strain JL1  
WT Fur, *mdaB-hydA::cat-TAG1*

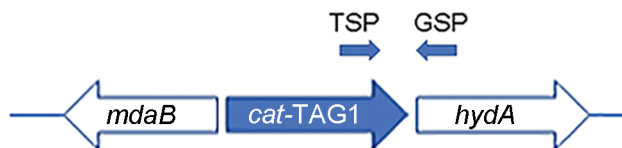

Strain JL3A  
WT Fur,  $\Delta fecA2::cat-TAG2$

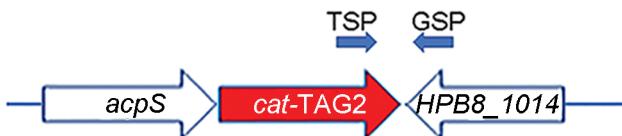

**B.**

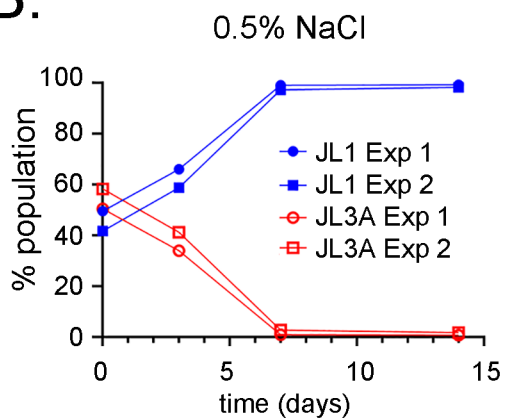

**C.**

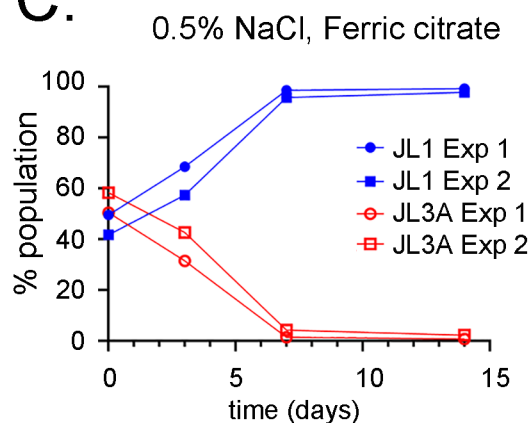

**D.**

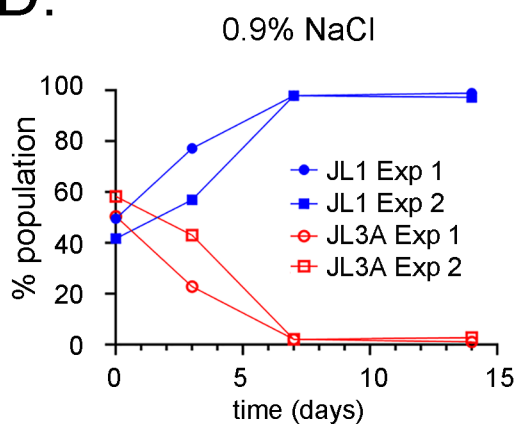

**E.**

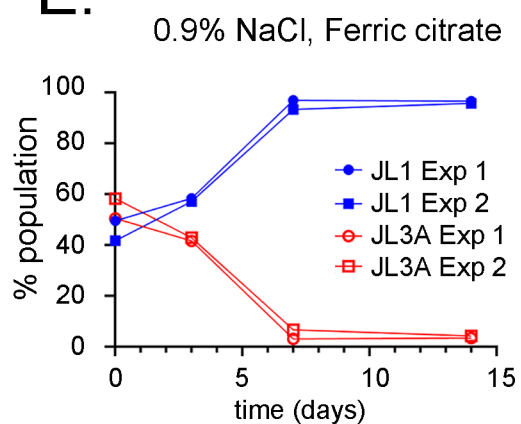

Supplementary Fig S4

Supplemental Table S1. Genes that are differentially expressed under regular salt conditions (0.5% added NaCl) between strains expressing Fur-R88H and WT Fur<sup>a</sup>

| B8 gene                                 | 26695/J99 gene | FDR <sup>b</sup> | fold <sup>c</sup> | Description                                                     |
|-----------------------------------------|----------------|------------------|-------------------|-----------------------------------------------------------------|
| <u>Increased expression in Fur-R88H</u> |                |                  |                   |                                                                 |
| HPB8_29                                 | N/A            | 5.4E-05          | 2.64              | putative endonuclease                                           |
| HPB8_116                                | HP1428         | 2.8E-02          | 2.31              | Ribosomal RNA large subunit methyltransferase N ( <i>rlmN</i> ) |
| HPB8_121                                | HP1423         | 2.5E-05          | 2.23              | hypothetical protein                                            |
| HPB8_123                                | HP1421         | 1.5E-02          | 2.12              | type IV secretion system protein VirB11, conjugation            |
| HPB8_125                                | HP1419         | 2.2E-02          | 20.93             | flagellar biosynthetic protein ( <i>fliQ</i> )                  |
| HPB8_158                                | HP1321         | 2.1E-03          | 2.65              | hypothetical protein                                            |
| HPB8_199                                | HP1281         | 9.5E-04          | 2.91              | anthranilate synthase component II ( <i>trpG</i> )              |
| HPB8_316                                | HP0054         | 2.8E-02          | 2.45              | conserved hypothetical protein                                  |
| HPB8_380                                | HP1121         | 2.8E-04          | 5.81              | DNA (cytosine-5-)-methyltransferase ( <i>dcm1</i> )             |
| HPB8_387                                | HP1116         | 2.4E-03          | 2.55              | hypothetical protein                                            |
| HPB8_449                                | HP0398         | 2.0E-02          | 2.12              | hypothetical protein                                            |
| HPB8_468                                | HP0418         | 3.5E-04          | 2.11              | ferrochelataase                                                 |
| HPB8_490                                | jhp0922        | 3.6E-02          | 2.77              | component of conjugal plasmid transfer system                   |
| HPB8_494                                | jhp1203        | 3.3E-02          | 4.93              | hypothetical protein                                            |
| HPB8_501                                | HP1003         | 3.0E-02          | 2.78              | hypothetical protein                                            |
| HPB8_504                                | HP1001         | 6.7E-07          | 2.26              | hypothetical protein                                            |
| HPB8_505                                | HP1000         | 1.1E-15          | 3.23              | putative chromosome partitioning protein ( <i>parA3</i> )       |
| HPB8_512                                | jhp0947        | 3.4E-03          | 2.07              | hypothetical protein                                            |
| HPB8_521                                | HP0995         | 1.9E-03          | 2.83              | hypothetical protein                                            |
| HPB8_528                                | jhp0936        | 4.9E-02          | 2.31              | hypothetical protein                                            |
| HPB8_532                                | HP1000         | 2.5E-18          | 3.11              | hypothetical protein                                            |
| HPB8_533                                | jhp0934        | 8.1E-12          | 2.48              | hypothetical protein                                            |
| HPB8_538                                | HP1006         | 1.0E-02          | 2.69              | type IV secretion system protein ( <i>virD4</i> , <i>traG</i> ) |
| HPB8_620                                | HP0929         | 1.5E-04          | 2.00              | geranyltranstransferase ( <i>ispA</i> )                         |
| HPB8_623                                | HP0926         | 4.0E-04          | 3.54              | tRNA pseudouridine synthase D ( <i>truD</i> )                   |
| HPB8_624                                | HP0925         | 1.1E-04          | 2.95              | Recombination protein ( <i>recR</i> )                           |
| HPB8_643                                | HP0909         | 2.2E-02          | 2.39              | restriction endonuclease ( <i>hpy8I</i> )                       |
| HPB8_672                                | HP1116         | 2.4E-03          | 2.55              | hypothetical protein                                            |
| HPB8_798                                | HP0600         | 4.0E-02          | 2.25              | Phosphate import ATP-binding protein ( <i>pstB</i> )            |
| HPB8_801                                | HP0602         | 2.9E-02          | 2.44              | Endonuclease III ( <i>nth3</i> )                                |
| HPB8_855                                | HP0652         | 6.7E-15          | 5.15              | phosphoserine phosphatase ( <i>serB</i> )                       |
| HPB8_856                                | HP0653         | 8.0E-27          | 6.01              | ferritin ( <i>pfr</i> )                                         |
| HPB8_877                                | HP0673         | 6.3E-06          | 2.57              | hypothetical protein                                            |
| HPB8_880                                | HP0677         | 1.8E-04          | 2.66              | hypothetical protein                                            |
| HPB8_980                                | HP0771         | 1.7E-02          | 2.79              | hypothetical protein                                            |
| HPB8_990                                | HP0781         | 1.9E-05          | 3.28              | hypothetical protein                                            |

|           |        |         |      |                                                          |
|-----------|--------|---------|------|----------------------------------------------------------|
| HPB8_1015 | HP0807 | 5.8E-33 | 7.32 | iron complex outer membrane protein ( <i>fecA2</i> )     |
| HPB8_1029 | HP0820 | 1.3E-05 | 2.45 | conserved hypothetical protein                           |
| HPB8_1056 | HP0846 | 2.8E-03 | 2.09 | type I restriction enzyme R subunit ( <i>hsdR1</i> )     |
| HPB8_1088 | HP0876 | 3.2E-09 | 4.38 | iron complex outer membrane r protein ( <i>frpB1</i> )   |
| HPB8_1089 | HP0877 | 1.0E-11 | 6.13 | crossover junction endodeoxyribonuclease ( <i>ruvC</i> ) |
| HPB8_1097 | HP0484 | 1.3E-03 | 3.53 | hypothetical protein                                     |
| HPB8_1098 | HP0051 | 7.0E-03 | 2.65 | DNA (cytosine-5-)-methyltransferase ( <i>dcm3</i> )      |
| HPB8_1127 | HP1011 | 3.2E-03 | 2.56 | dihydroorotate oxidase ( <i>pyrD</i> )                   |
| HPB8_1159 | HP1041 | 1.4E-04 | 2.02 | flagellar biosynthesis protein ( <i>flhA</i> )           |
| HPB8_1160 | HP1042 | 1.3E-06 | 2.87 | hypothetical protein                                     |
| HPB8_1170 | HP1051 | 9.1E-16 | 2.70 | hypothetical protein                                     |
| HPB8_1235 | HP0329 | 2.2E-03 | 2.05 | NH(3)-dependent NAD(+) synthetase ( <i>nadE</i> )        |
| HPB8_1249 | HP0313 | 6.9E-04 | 2.95 | hypothetical protein ( <i>nark</i> )                     |
| HPB8_1282 | HP0280 | 1.9E-04 | 2.02 | heat shock protein B ( <i>htrB</i> )                     |
| HPB8_1300 | HP0262 | 1.8E-02 | 2.78 | Uncharacterized protein HP_0262                          |
| HPB8_1301 | HP0262 | 2.4E-02 | 2.55 | Uncharacterized protein HP_0262                          |
| HPB8_1393 | HP0173 | 1.7E-02 | 2.42 | flagellar biosynthetic protein ( <i>flhR</i> )           |
| HPB8_1415 | HP0150 | 1.9E-02 | 2.28 | hypothetical protein                                     |
| HPB8_1430 | HP0135 | 1.4E-03 | 2.52 | Uncharacterized protein jhp_0123                         |
| HPB8_1447 | HP1187 | 2.9E-04 | 2.58 | hypothetical protein                                     |
| HPB8_1628 | HP1588 | 1.5E-02 | 2.22 | UPF0174 protein jhp_1494                                 |

#### Decreased expression in Fur-R88H

|          |        |         |      |                                                              |
|----------|--------|---------|------|--------------------------------------------------------------|
| HPB8_45  | HP1485 | 3.1E-02 | 0.44 | hypothetical protein                                         |
| HPB8_78  | HP1456 | 3.1E-19 | 0.42 | membrane associated lipoprotein ( <i>lpp20</i> )             |
| HPB8_79  | HP1455 | 1.9E-22 | 0.29 | hypothetical protein                                         |
| HPB8_80  | HP1454 | 6.5E-30 | 0.21 | hypothetical protein                                         |
| HPB8_95  | HP1441 | 9.5E-04 | 0.44 | peptidyl-prolyl cis-trans isomerase B ( <i>ppiA</i> )        |
| HPB8_105 | HP1436 | 3.5E-02 | 0.41 | hypothetical protein                                         |
| HPB8_141 | HP1338 | 7.1E-04 | 0.45 | nickel-responsive regulator ( <i>nikR</i> )                  |
| HPB8_142 | HP1337 | 4.5E-03 | 0.47 | nicotinate-nucleotide adenylyltransferase ( <i>nadD</i> )    |
| HPB8_154 | HP1325 | 3.5E-06 | 0.25 | fumarate hydratase ( <i>fumC</i> )                           |
| HPB8_155 | HP1324 | 2.3E-05 | 0.30 | hypothetical protein                                         |
| HPB8_162 | HP1317 | 7.1E-03 | 0.37 | ribosomal protein L23 ( <i>rpLW</i> )                        |
| HPB8_224 | HP1256 | 1.7E-02 | 0.25 | ribosome recycling factor ( <i>frr</i> )                     |
| HPB8_285 | HP1205 | 2.8E-06 | 0.39 | elongation factor EF-Tu                                      |
| HPB8_286 | HP1204 | 3.9E-06 | 0.41 | ribosomal protein L33 ( <i>rpmG</i> )                        |
| HPB8_304 | HP1186 | 1.4E-08 | 0.22 | carbonic anhydrase ( <i>cah</i> )                            |
| HPB8_377 | HP1123 | 3.8E-05 | 0.45 | peptidyl-prolyl cis-trans isomerase ( <i>slyD</i> )          |
| HPB8_381 | HP1120 | 5.3E-03 | 0.10 | hypothetical protein                                         |
| HPB8_466 | HP0416 | 3.5E-06 | 0.38 | cyclopropane-fatty-acyl-phospholipid synthase ( <i>cfa</i> ) |
| HPB8_580 | HP0966 | 1.3E-04 | 0.44 | hypothetical protein                                         |



|           |         |         |      |                                                          |
|-----------|---------|---------|------|----------------------------------------------------------|
| HPB8_652  | HP0900  | 5.4E-05 | 0.28 | hydrogenase nickel incorporation protein ( <i>hypB</i> ) |
| HPB8_653  | HP0899  | 1.7E-03 | 0.40 | hydrogenase formation protein ( <i>hypC</i> )            |
| HPB8_697  | HP0546  | 7.0E-04 | 0.49 | <i>cagC</i>                                              |
| HPB8_731  | HP0515  | 1.5E-04 | 0.49 | heat shock protein ( <i>hsIV</i> )                       |
| HPB8_745  | HP0551  | 5.5E-05 | 0.40 | 50S ribosomal protein L31 ( <i>rpmE</i> )                |
| HPB8_763  | HP0567  | 3.8E-06 | 0.27 | hypothetical membrane protein                            |
| HPB8_787  | HP1589  | 5.2E-07 | 0.40 | 2-oxoglutarate ferredoxin oxidoreductase ( <i>oorA</i> ) |
| HPB8_788  | HP1590  | 5.2E-07 | 0.39 | 2-oxoglutarate ferredoxin oxidoreductase ( <i>oorB</i> ) |
| HPB8_803  | HP0604  | 8.8E-06 | 0.43 | uroporphyrinogen decarboxylase ( <i>hemE</i> )           |
| HPB8_925  | HP0719  | 2.0E-06 | 0.27 | hypothetical protein                                     |
| HPB8_926  | HP0721  | 8.7E-05 | 0.31 | hypothetical protein                                     |
| HPB8_985  | HP0776  | 2.9E-02 | 0.50 | DNA-directed RNA polymerase subunit ( <i>rpoZ</i> )      |
| HPB8_986  | HP0777  | 6.3E-06 | 0.50 | uridylate kinase ( <i>pyrH</i> )                         |
| HPB8_1020 | HP0812  | 4.5E-02 | 0.43 | hypothetical protein                                     |
| HPB8_1033 | HP0824  | 4.5E-08 | 0.23 | thioredoxin 1 ( <i>trxA</i> )                            |
| HPB8_1034 | HP0825  | 3.6E-08 | 0.40 | thioredoxin reductase (NADPH) ( <i>trxB3</i> )           |
| HPB8_1061 | HP0851  | 1.1E-03 | 0.37 | hypothetical protein                                     |
| HPB8_1198 | HP1079  | 1.0E-04 | 0.39 | hypothetical protein                                     |
| HPB8_1247 | HP0318  | 3.1E-08 | 0.30 | hypothetical protein                                     |
| HPB8_1264 | HP0298  | 8.6E-06 | 0.45 | dipeptide ABC transporter ( <i>dppA</i> )                |
| HPB8_1285 | HP0277  | 2.2E-05 | 0.41 | ferredoxin ( <i>fer</i> )                                |
| HPB8_1370 | HP0197  | 2.5E-06 | 0.48 | S-adenosylmethionine synthetase ( <i>metK</i> )          |
| HPB8_1425 | HP0140  | 9.3E-09 | 0.45 | lactate transporter%2C LctP family ( <i>lctP3</i> )      |
| HPB8_1455 | HP0110  | 2.9E-06 | 0.47 | molecular chaperone ( <i>grpE</i> )                      |
| HPB8_1456 | HP0106  | 1.3E-08 | 0.38 | molecular chaperone ( <i>dnaK</i> )                      |
| HPB8_1480 | jhp0078 | 5.9E-03 | 0.14 | Uncharacterized protein jhp_0078                         |
| HPB8_1481 | HP0084  | 3.1E-07 | 0.42 | ribosomal protein L13 ( <i>rplM</i> )                    |
| HPB8_1502 | HP0065  | 4.4E-02 | 0.45 | hypothetical protein                                     |
| HPB8_1503 | HP0064  | 6.7E-03 | 0.28 | hypothetical protein                                     |
| HPB8_1511 | HP0057  | 3.8E-05 | 0.37 | hypothetical protein                                     |
| HPB8_1564 | HP1410  | 2.3E-02 | 0.50 | hypothetical protein                                     |
| HPB8_1596 | HP0028  | 3.4E-03 | 0.50 | hypothetical protein                                     |
| HPB8_1597 | HP0027  | 6.1E-06 | 0.42 | isocitrate dehydrogenase ( <i>icd</i> )                  |
| HPB8_1620 | HP0005  | 4.5E-04 | 0.48 | orotidine-5'-phosphate decarboxylase ( <i>pyrF</i> )     |

<sup>3</sup>*H. pylori* strains expressing either Fur-R88H or WT Fur were grown in Brucella broth containing 0.5% NaCl for 15 h. RNA-seq was performed as described in Materials and Methods. Genes considered differentially expressed demonstrated fold change values (Fur-R88H vs WT Fur) either >2 or <0.5, with a false-discovery rate <0.05.

<sup>b</sup>FDR, false-discovery rate.

<sup>c</sup>“Fold” indicates fold change values. The fold change values are a ratio of RNA-seq reads from cultures expressing Fur-R88H to RNA-seq reads from cultures expressing WT Fur.

Supplemental Table S2. Genes that are differentially expressed in strains containing Fur-R88H or WT Fur, cultured under high-salt conditions <sup>a</sup>

| B8 gene                          | 26695 gene    | <sup>b</sup> FDR | fold | Description                                       |
|----------------------------------|---------------|------------------|------|---------------------------------------------------|
| increased expression in Fur-R88H |               |                  |      |                                                   |
| HPB8_545                         | HP0040        | 2.25E-02         | 3.30 | type IV secretion system protein ( <i>virB9</i> ) |
| HPB8_1015                        | HP0807        | 1.45E-05         | 2.23 | outer membrane protein ( <i>fecA2</i> )           |
| HPB8_1322                        | HP0241        | 5.82E-03         | 2.27 | conserved hypothetical protein                    |
| decreased expression in Fur-R88H |               |                  |      |                                                   |
| HPB8_80                          | HP1454        | 1.50E-06         | 0.41 | conserved hypothetical protein                    |
| HPB8_389                         | HP0489/HP1115 | 7.08E-04         | 0.03 | conserved hypothetical protein                    |
| HPB8_580                         | HP0966        | 1.24E-03         | 0.48 | conserved hypothetical protein                    |
| HPB8_581                         | HP0965        | 1.45E-05         | 0.39 | probable tRNA modification GTPase ( <i>trmE</i> ) |

<sup>a</sup>*H. pylori* strains containing either Fur-R88H or WT Fur were grown in BB-FBS broth containing 1.0% added NaCl for 15 h. RNA-seq was performed as described in Materials and Methods. Genes considered differentially expressed demonstrated fold change values (Fur-R88H vs WT Fur) either >2 or <0.5, with a false-discovery rate <0.05.

<sup>b</sup>FDR, false-discovery rate.

<sup>c</sup>“Fold” indicates fold change values. The fold change values are a ratio of RNA-seq reads from the strain containing Fur-R88H to RNA-seq reads from the strain containing WT Fur.

Supplemental Table S3. List of plasmids and strains used in this study

| Plasmids                        |                                                                                                                                    |            |
|---------------------------------|------------------------------------------------------------------------------------------------------------------------------------|------------|
| Name                            | Relevant Characteristics                                                                                                           | Reference  |
| p630cat-TAG1                    | pUC57, <i>cat</i> -TAG1 sequence inserted into <i>mdaB-hydA</i> intergenic region                                                  | 45         |
| p630cat-TAG2                    | pUC57, <i>cat</i> -TAG1 sequence inserted into <i>mdaB-hydA</i> intergenic region                                                  | 45         |
| pΔ <i>fecA2</i> -catTAG1        | pUC57 containing 500 bp upstream and downstream of <i>fecA2</i> . <i>fecA2</i> replaced with <i>cat</i> -TAG1 nucleotide sequences | This study |
| pΔ <i>fecA2</i> -catTAG2        | pUC57 containing 500 bp upstream and downstream of <i>fecA2</i> . <i>fecA2</i> replaced with <i>cat</i> -TAG2 nucleotide sequences | This study |
| p177:: <i>aacC4-rpsL</i>        | pGEMT, <i>aacC4-rpsL</i> cassette inserted into intergenic region between HPB8_1388 ( <i>neuB</i> ) and HPB8_1389 ( <i>efp</i> )   | This study |
| p <i>fecA2</i>                  | pGEMT, <i>fecA2</i> inserted into <i>neuB-efp</i> intergenic region                                                                | This study |
| <u><i>H. pylori</i> strains</u> |                                                                                                                                    |            |
| 7.13 WTFur-1                    | 7.13, <i>rpsL-K43R</i> , Sm <sup>R</sup> , WT Fur                                                                                  | 14         |
| 7.13 Fur-R88H-1                 | 7.13, <i>rpsL-K43R</i> , Sm <sup>R</sup> , Fur-R88H                                                                                | 14         |
| JL1                             | 7.13 WTFur-1, <i>cat</i> -TAG1 insertion into <i>mdaB-hydA</i> intergenic region, Sm <sup>R</sup> , Cm <sup>R</sup>                | This study |
| JL2                             | 7.13 Fur-R88H-1, <i>cat</i> -TAG2 insertion into <i>mdaB-hydA</i> intergenic region, Sm <sup>R</sup> , Cm <sup>R</sup>             | This study |
| JL3A                            | 7.13 WTFur-1, replacement of <i>fecA2</i> with <i>cat</i> -TAG2, Sm <sup>R</sup> , Cm <sup>R</sup>                                 | This study |
| JL3B                            | 7.13 WTFur-1, replacement of <i>fecA2</i> with <i>cat</i> -TAG1, Sm <sup>R</sup> , Cm <sup>R</sup>                                 | This study |
| JL4                             | 7.13 Fur-R88H-1, replacement of <i>fecA2</i> with <i>cat</i> -TAG2, Sm <sup>R</sup> , Cm <sup>R</sup>                              | This study |
| JL5                             | JL4, <i>aacC4-rpsL</i> inserted in <i>neuB-efp</i> intergenic region, Gent <sup>R</sup> , Cm <sup>R</sup>                          | This study |
| JL6                             | JL5, <i>neuB-efp</i> intergenic region restored, Sm <sup>R</sup> , Cm <sup>R</sup>                                                 | This study |
| JL7                             | JL5, <i>fecA2</i> inserted in <i>neuB-efp</i> intergenic region, Sm <sup>R</sup> , Cm <sup>R</sup>                                 | This study |

Supplemental Table S4. Primers used in this study

RT-qPCR primers

| <u>Gene</u>  | <u>Forward primer</u>          | <u>Reverse primer</u>         |
|--------------|--------------------------------|-------------------------------|
| <i>fecA1</i> | 5'-ATGGTATGCGAACTACCGCC-3'     | 5'-TAGCGTTGCCCCACTTCAAT-3'    |
| <i>fecA2</i> | 5'-TCTCGCACGGTGATTTCCAA-3'     | 5'-GCGCACCGAAATTTTAGGCA-3'    |
| <i>fecA3</i> | 5'-ATGTGGGTATCCAAGCGCAA-3'     | 5'-TCTTGCTCGCTGAGTGATCC-3'    |
| <i>frpB1</i> | 5'-TATTGCACCCCAAGCTTTTC-3'     | 5'-AAGGCTGTCTGTGGCTTCAT-3'    |
| <i>gyrB</i>  | 5-CGTGGATAACGCTGTAGATGAGAGC-3' | 5'-GGGATTTTTTCCGTGGGGTG-3'    |
| 16S rRNA     | 5'-GGAGTACGGTCGCAAGATTA-3'     | 5'-CTAGCGGATTCTCTCAATGTCAA-3' |
| HPB8_80      | 5'-ATGCCTTATGGCTTTTGTGG-3'     | 5'-CCACGCTAATAGACGCCACT-3'    |
| HPB8_389     | 5'-ACAGCCCGAAGTGAAAGAAA-3'     | 5'-TTCGCTTCAAGCTCTCTCC-3'     |
| HPB8_545     | 5'-CCTTGCAAATTGGCGTAGAT-3'     | 5'-TGGGTGCTATGAGTGGGTTT-3'    |
| HPB8_580     | 5'-AGGCAGTAGCGTTTTGCCTA-3'     | 5'-TACTTCGGCGCATTCTCTTT-3'    |
| HPB8_581     | 5'-CTTTGAATGACAGCGTTGGA-3'     | 5'-CCGTCTTTGCTCCTATCTCG-3'    |
| HPB8_1322    | 5'-GCTTATCCGCTATGGCTTGA-3'     | 5'-AGCGTCCAATAGAGCGTGAT-3'    |

Competition Assays

| <u>Strain</u>               | <u>Forward primer (TAG specific, TSP)</u> | <u>Reverse primer (Gene specific, GSP)</u> |
|-----------------------------|-------------------------------------------|--------------------------------------------|
| JL1                         | 5'-TTCCGACGTACAGTTGTACAG-3'               | 5'-TTTGGCTCCATTAATGATGAGT-3'               |
| JL2                         | 5'-CTACGTTCCCGAGGCCGTACA-3'               | 5'-TTTGGCTCCATTAATGATGAGT-3'               |
| JL3B                        | 5'-TTCCGACGTACAGTTGTACAG-3'               | 5'-CGATCCACAAAAACCATTCC-3'                 |
| JL3A, JL4, JL5,<br>JL6, JL7 | 5'-CTACGTTCCCGAGGCCGTACA-3'               | 5'-CGATCCACAAAAACCATTCC-3'                 |
